# Supplementary material
Source: HighWire-hosted journal article supplement (https://bmjopen.bmj.com/content/12/9/e061169)
Supplement: inline-supplementary-material-1 [file inline-supplementary-material-1.pdf]

**Supplementary File 1: Questions asked to measure diet and physical activity (basic knowledge and practice).**

**Section A: Dietary basic knowledge**

| No. | Item                                                                                          | Possible responses               | Score                    |
|-----|-----------------------------------------------------------------------------------------------|----------------------------------|--------------------------|
| 1   | A healthy diet is one that includes a variety of fruits.                                      | 1. Yes<br>2. No<br>3. Don't Know | <input type="checkbox"/> |
| 2   | A healthy diet is one that includes a variety of vegetables.                                  | 1. Yes<br>2. No<br>3. Don't Know | <input type="checkbox"/> |
| 3   | A healthy diet is one that includes a variety of legumes.                                     | 1. Yes<br>2. No<br>3. Don't Know | <input type="checkbox"/> |
| 4   | A healthy diet is one that includes a variety of whole grains.                                | 1. Yes<br>2. No<br>3. Don't Know | <input type="checkbox"/> |
| 5   | A healthy diet is one that includes a variety of proteins (e.g., fish, dairy, meat, chicken). | 1. Yes<br>2. No<br>3. Don't Know | <input type="checkbox"/> |
| 6   | A healthy diet is one that includes a variety of candies and sweets.                          | 1. Yes<br>2. No<br>3. Don't Know | <input type="checkbox"/> |
| 7   | The main meals (breakfast, lunch, dinner) are important for health.                           | 1. Yes<br>2. No<br>3. Don't Know | <input type="checkbox"/> |
| 8   | To lose body weight a person may need to eat fewer calories.                                  | 1. Yes<br>2. No<br>3. Don't Know | <input type="checkbox"/> |
| 9   | Good nutrition may prevent chronic diseases like high blood pressure.                         | 1. Yes<br>2. No<br>3. Don't Know | <input type="checkbox"/> |
| 10  | A person who eats unhealthy food may develop health problems.                                 | 1. Yes<br>2. No<br>3. Don't Know | <input type="checkbox"/> |

**Section B: Dietary practices in the past 24 hours**

| No. | Item                                          | Possible responses | Score                    |
|-----|-----------------------------------------------|--------------------|--------------------------|
| 1   | Did you eat sweets (e.g., chocolate, Knafeh)? | 1. Yes<br>2. No    | <input type="checkbox"/> |
| 2   | Did you eat processed food (e.g., salami)?    | 1. Yes<br>2. No    | <input type="checkbox"/> |

|          |                                                                          |                 |                          |
|----------|--------------------------------------------------------------------------|-----------------|--------------------------|
| <b>3</b> | Did you eat fast food (e.g., falafel, shawerma, chips)?                  | 1. Yes<br>2. No | <input type="checkbox"/> |
| <b>4</b> | Did you have energy drinks?                                              | 1. Yes<br>2. No | <input type="checkbox"/> |
| <b>5</b> | Did you have sugar-sweetened beverages (e.g., cola, manufactured juice)? | 1. Yes<br>2. No | <input type="checkbox"/> |

### Section C: Physical activity basic knowledge

| No.      | Item                                                                                                               | Possible responses               | Score                    |
|----------|--------------------------------------------------------------------------------------------------------------------|----------------------------------|--------------------------|
| <b>1</b> | Physical activity (e.g., swimming, football or other sports) prevents cardiovascular diseases.                     | 1. Yes<br>2. No<br>3. Don't Know | <input type="checkbox"/> |
| <b>2</b> | Physical activity (e.g., swimming, football or other sports) helps to control diabetes.                            | 1. Yes<br>2. No<br>3. Don't Know | <input type="checkbox"/> |
| <b>3</b> | Physical activity (e.g., swimming, football or other sports) prevents overweight and obesity problems.             | 1. Yes<br>2. No<br>3. Don't Know | <input type="checkbox"/> |
| <b>4</b> | Physical activity (e.g., swimming, football or other sports) does not help proper growth in childhood and youth.   | 1. Yes<br>2. No<br>3. Don't Know | <input type="checkbox"/> |
| <b>5</b> | Physical activity (e.g., swimming, football or other sports) helps to strengthen body muscles including the heart. | 1. Yes<br>2. No<br>3. Don't Know | <input type="checkbox"/> |
| <b>6</b> | Physical activity (e.g., swimming, football or other sports) improves blood circulation.                           | 1. Yes<br>2. No<br>3. Don't Know | <input type="checkbox"/> |

### Section D: Physical activity practices

| No.      | Item                                                                                | Response                 |
|----------|-------------------------------------------------------------------------------------|--------------------------|
| <b>1</b> | How many times per week do you exercise (e.g., swimming, football or other sports)? | <input type="checkbox"/> |
